# Supplementary material for: Discovery of a Ce3+-activated red nitride phosphor for high-brightness solid-state lighting
Source: Royal Society of Chemistry journal article supplement (doi:10.1039/d0tc03964k), 2020-01-01
Supplement: d0tc03964k1.pdf [file d0tc03964k1.pdf]

## Supporting Information

### Discovery of a Ce<sup>3+</sup>-Activated Red Nitride Phosphor for High-Brightness Solid-State Lighting

Yonghui Xia,<sup>a</sup> Shuxing Li<sup>\*a</sup>, Takashi Takeda,<sup>b</sup> Naoto Hirotsuki,<sup>b</sup> and Rong-Jun Xie<sup>\*a</sup>

<sup>a</sup>College of Materials, Xiamen University, Simingnan-Road 422, Xiamen 361005, P. R. China. E-mail: [rjxie@xmu.edu.cn](mailto:rjxie@xmu.edu.cn); [lishuxing@xmu.edu.cn](mailto:lishuxing@xmu.edu.cn)

<sup>b</sup>Sialon Group, National Institute for Materials Science (NIMS), Tsukuba, Ibaraki 305-0035, Japan.

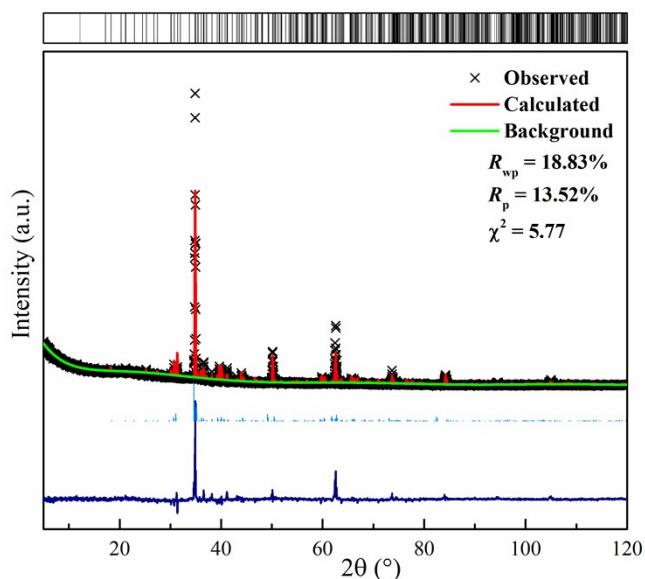

**Figure S1.** Rietveld refinement of observed HP-CaSiN<sub>2</sub> XRD pattern on the basis of AP-CaSiN<sub>2</sub> structure.

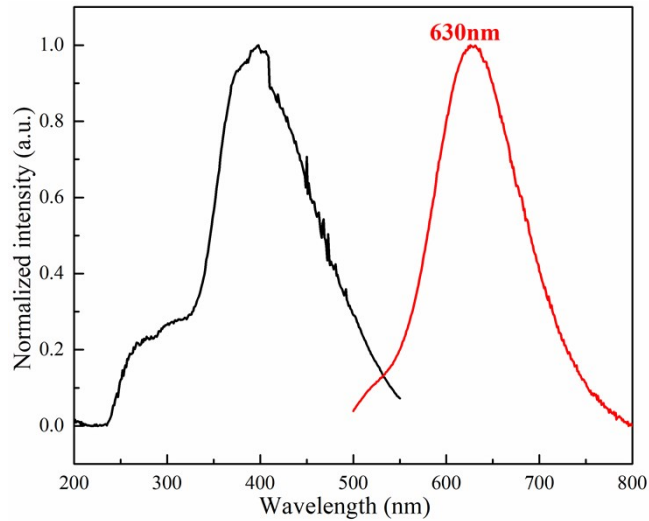

**Figure S2.** Excitation and emission spectra of non-doped HP-CaSiN<sub>2</sub>.

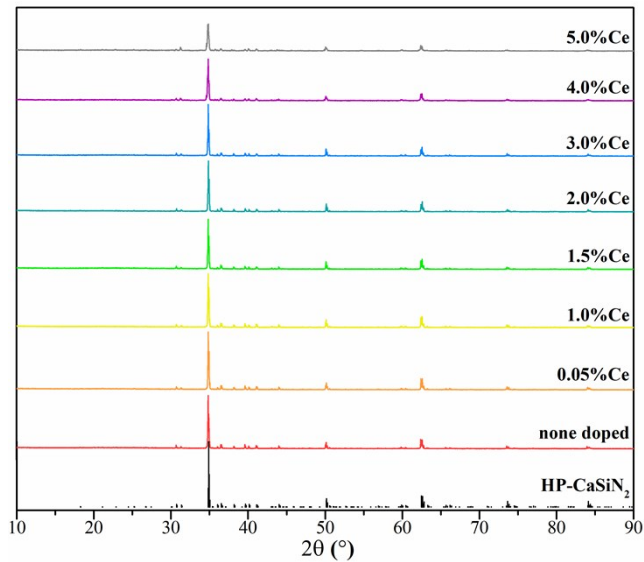

**Figure S3.** XRD patterns for HP-Ca<sub>(1-x)</sub>SiN<sub>2</sub>:xCe<sup>3+</sup> ( $x = 0-5.0\%$ ).

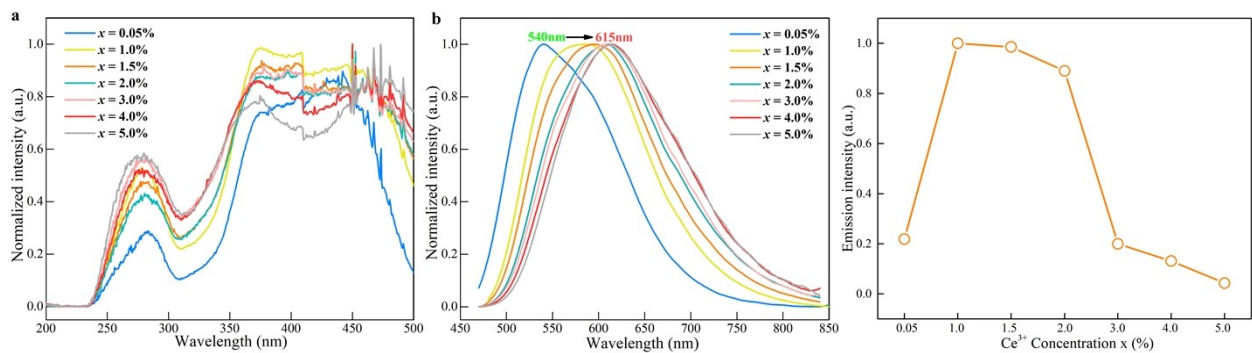

**Figure S4.** (a) The excitation ( $\lambda_{em} = 610$  nm), (b) emission spectra ( $\lambda_{ex} = 450$  nm) and emission intensity of HP-Ca<sub>(1-x)</sub>SiN<sub>2</sub>:xCe<sup>3+</sup>.

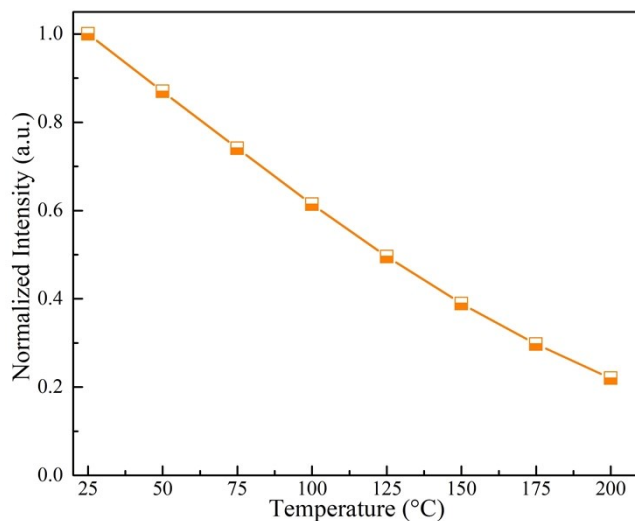

**Figure S5.** Temperature-dependent normalized integrated PL intensities of HP- $\text{Ca}_{0.98}\text{SiN}_2:0.02\text{Ce}^{3+}$ .

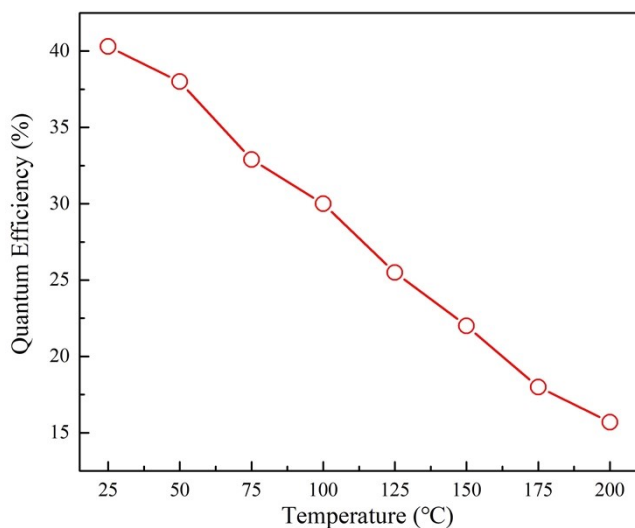

**Figure S6.** Temperature-dependent quantum efficiency of HP- $\text{Ca}_{0.98}\text{SiN}_2:0.02\text{Ce}^{3+}$ .

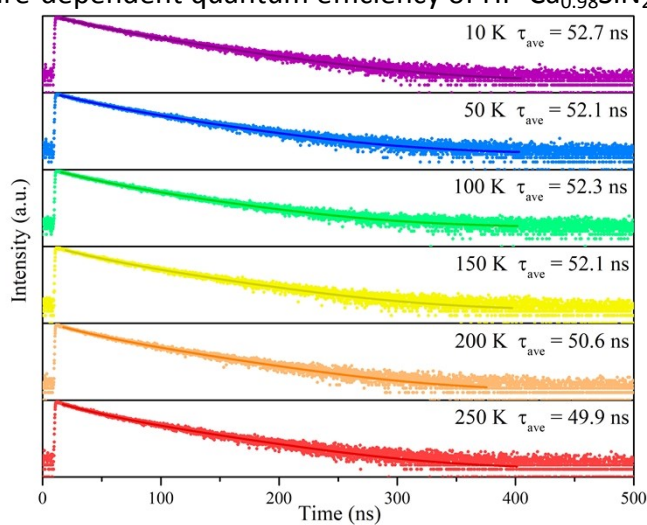

**Figure S7.** Temperature-dependent decay curves of HP- $\text{Ca}_{0.98}\text{SiN}_2:0.02\text{Ce}^{3+}$  monitored at 610 nm, excited at 450 nm.

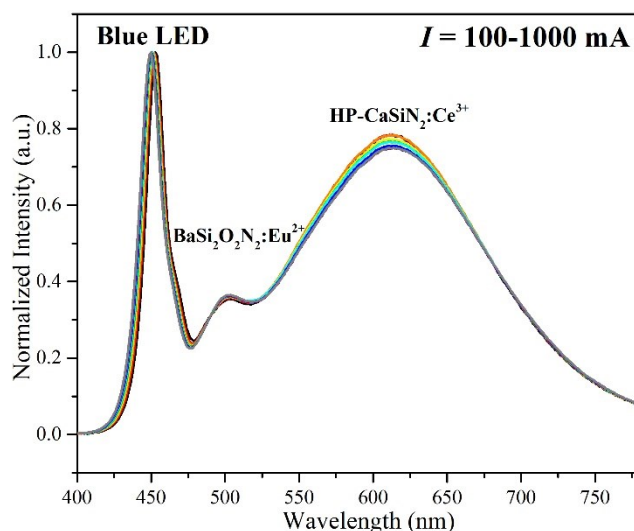

**Figure S8.** Luminescence spectra of the fabricated white LED driven by current increasing from 100 to 1000 mA.

**Table S1.** The space group, band gap, average bond length ( $R_{av}$ ) and distortion index ( $D$ ) of potential nitridosilicate candidates.

| Nitride                                                                          | Space group                                                        | Band gap (PBE) <sup>a)</sup>            | $R_{av}$ <sup>b)</sup> | distortion index ( $D$ ) <sup>b)</sup> |
|----------------------------------------------------------------------------------|--------------------------------------------------------------------|-----------------------------------------|------------------------|----------------------------------------|
| SrSi <sub>6</sub> N <sub>8</sub>                                                 | <i>Imm2</i>                                                        | 3.21 <sup>1</sup>                       | 3.028                  | 0.048                                  |
| BaSi <sub>6</sub> N <sub>8</sub>                                                 | <i>Imm2</i>                                                        | 3.25 <sup>1</sup>                       | 3.062                  | 0.040                                  |
| SrSi <sub>7</sub> N <sub>10</sub>                                                | <i>Pc</i>                                                          | 4.28 <sup>1</sup>                       | 3.268                  | 0.082                                  |
| BaSi <sub>7</sub> N <sub>10</sub>                                                | <i>Pc</i>                                                          | 4.11 <sup>1</sup>                       | 3.247                  | 0.043                                  |
| Ca <sub>2</sub> Si <sub>5</sub> N <sub>8</sub>                                   | <i>Cc</i>                                                          | 3.65 <sup>1</sup>                       | 2.638                  | 0.082                                  |
| Sr <sub>2</sub> Si <sub>5</sub> N <sub>8</sub>                                   | <i>Pmn2</i> <sub>1</sub>                                           | 3.20 <sup>1</sup>                       | 2.866                  | 0.068                                  |
| Ba <sub>2</sub> Si <sub>5</sub> N <sub>8</sub>                                   | <i>Pmn2</i> <sub>1</sub>                                           | 2.88 <sup>1</sup>                       | 2.917                  | 0.046                                  |
| LaSi <sub>3</sub> N <sub>5</sub>                                                 | <i>P2</i> <sub>1</sub> <i>2</i> <sub>1</sub> <i>2</i> <sub>1</sub> | 3.19 <sup>1</sup>                       | 2.700                  | 0.049                                  |
| La <sub>3</sub> Si <sub>6</sub> N <sub>11</sub>                                  | <i>P4bm</i>                                                        | 2.97 <sup>1</sup>                       | 2.647                  | 0.001                                  |
| ZnSiN <sub>2</sub>                                                               | <i>Pna2</i> <sub>1</sub>                                           | 4.83 <sup>2</sup>                       | 2.109                  | 0.010                                  |
| MgSiN <sub>2</sub>                                                               | <i>Pna2</i> <sub>1</sub>                                           | 3.97 <sup>1</sup>                       | 2.090                  | 0.011                                  |
| Cubic-CaSiN <sub>2</sub><br>(Ca <sub>16</sub> Si <sub>17</sub> N <sub>34</sub> ) | <i>F3m</i>                                                         | 4.50 <sup>3</sup><br>(optical band gap) | 2.481                  | 0.079                                  |
| AP-CaSiN <sub>2</sub><br>(ambient-<br>pressure phase)                            | <i>Pbca</i>                                                        | 3.44                                    | 2.506                  | 0.046                                  |
| <b>HP-CaSiN<sub>2</sub><br/>(high-pressure<br/>phase)</b>                        | <i>Pbca</i>                                                        | <b>3.44</b>                             | <b>2.570</b>           | <b>0.086</b>                           |
| SrSiN <sub>2</sub>                                                               | <i>P2</i> <sub>1</sub> / <i>c</i>                                  | 2.97 <sup>1</sup>                       | 2.843                  | 0.069                                  |
| BaSiN <sub>2</sub>                                                               | <i>Cmca</i>                                                        | 2.92 <sup>1</sup>                       | 2.986                  | 0.061                                  |
| La <sub>5</sub> Si <sub>3</sub> N <sub>9</sub>                                   | <i>Cmca</i>                                                        | 1.97 <sup>1</sup>                       | 2.553                  | 0.074                                  |
| Ca <sub>5</sub> Si <sub>2</sub> N <sub>6</sub>                                   | <i>C2</i> / <i>c</i>                                               | 2.46 <sup>1</sup>                       | 2.447                  | 0.023                                  |
| Ba <sub>5</sub> Si <sub>2</sub> N <sub>6</sub>                                   | <i>P2</i> <sub>1</sub> <i>2</i> <sub>1</sub> <i>2</i> <sub>1</sub> | 1.40 <sup>1</sup>                       | 2.977                  | 0.073                                  |
| Ca <sub>4</sub> SiN <sub>4</sub>                                                 | <i>P2</i> <sub>1</sub> / <i>c</i>                                  | 1.45 <sup>1</sup>                       | 2.454                  | 0.034                                  |

|                                                                                |                                     |                                          |       |       |
|--------------------------------------------------------------------------------|-------------------------------------|------------------------------------------|-------|-------|
| SrMg <sub>3</sub> SiN <sub>4</sub>                                             | <i>I4<sub>1</sub>/a</i>             | 4.90 <sup>4</sup><br>(optical band gap)  | 2.863 | 0.049 |
| CaMg <sub>3</sub> SiN <sub>4</sub>                                             | <i>I4<sub>1</sub>/a</i>             | 2.60 <sup>5</sup>                        | 2.733 | 0.052 |
| BaMg <sub>3</sub> SiN <sub>4</sub>                                             | <i>P</i>                            | 4.00 <sup>4</sup><br>(optical band gap)  | 2.953 | 0.015 |
| Ca <sub>3</sub> Li <sub>4</sub> Si <sub>2</sub> N <sub>6</sub>                 | <i>C2/m</i>                         | 2.29 <sup>1</sup>                        | 2.580 | 0.045 |
| Sr <sub>3</sub> Li <sub>4</sub> Si <sub>2</sub> N <sub>6</sub>                 | <i>C2/m</i>                         | unknown                                  | 2.706 | 0.022 |
| SrAlSi <sub>4</sub> N <sub>7</sub>                                             | <i>Pna2<sub>1</sub></i>             | 3.58 <sup>1</sup>                        | 2.713 | 0.054 |
| Ba <sub>2</sub> AlSi <sub>5</sub> N <sub>9</sub>                               | <i>P1</i>                           | unknown                                  | 2.955 | 0.030 |
| SrYSi <sub>4</sub> N <sub>7</sub>                                              | <i>P6<sub>3</sub>mc</i>             | 2.74 <sup>1</sup>                        | 3.012 | 0.015 |
| CaLi <sub>2</sub> Si <sub>2</sub> N <sub>4</sub>                               | <i>Pa</i>                           | 3.46 <sup>6</sup>                        | 2.499 | 0.004 |
| SrLi <sub>2</sub> Si <sub>2</sub> N <sub>4</sub>                               | <i>Pa</i>                           | 3.44 <sup>1</sup>                        | 2.689 | 0.001 |
| CaAlSiN <sub>3</sub>                                                           | <i>Cmc21</i>                        | 3.36 <sup>7</sup>                        | 2.470 | 0.053 |
| Ca <sub>5</sub> Al <sub>2</sub> Si <sub>2</sub> N <sub>8</sub>                 | <i>Pbcn</i>                         | 2.79 <sup>1</sup>                        | 2.526 | 0.033 |
| Sr <sub>8</sub> Mg <sub>7</sub> Si <sub>9</sub> N <sub>22</sub>                | <i>C2/m</i>                         | 2.90 <sup>8</sup>                        | 2.764 | 0.035 |
| Ca <sub>3</sub> LiSi <sub>2</sub> N <sub>5</sub>                               | <i>C2/c</i>                         | 2.44 <sup>1</sup>                        | 2.511 | 0.039 |
| La <sub>17</sub> Al <sub>4</sub> Si <sub>9</sub> N <sub>33</sub>               | <i>F3m</i>                          | 1.88 <sup>1</sup>                        | 2.578 | 0.011 |
| Li <sub>5</sub> La <sub>5</sub> Si <sub>4</sub> N <sub>12</sub>                | <i>Pb2</i>                          | unknown                                  | 2.580 | 0.032 |
| Sr <sub>4</sub> Li <sub>2</sub> Si <sub>2</sub> N <sub>6</sub>                 | <i>Pa</i>                           | 2.20 <sup>1</sup>                        | 2.671 | 0.029 |
| Ca <sub>2</sub> Ba <sub>3</sub> Si <sub>2</sub> N <sub>6</sub>                 | <i>C2/c</i>                         | 1.55 <sup>1</sup>                        | 2.513 | 0.040 |
| MgBa <sub>4</sub> Si <sub>2</sub> N <sub>6</sub>                               | <i>Fddd</i>                         | 1.59 <sup>1</sup>                        | 2.845 | 0.047 |
| Li <sub>2</sub> Ca <sub>2</sub> Mg <sub>2</sub> Si <sub>2</sub> N <sub>6</sub> | <i>C2/m</i>                         | 4.26 <sup>9</sup><br>(optical band gap)  | 2.588 | 0.041 |
| Li <sub>2</sub> Ca <sub>3</sub> MgSi <sub>2</sub> N <sub>6</sub>               | <i>C2/m</i>                         | unknown                                  | 2.513 | 0.038 |
| Li <sub>4</sub> Ca <sub>2</sub> MgSi <sub>2</sub> N <sub>6</sub>               | <i>C2/m</i>                         | unknown                                  | 2.482 | 0.015 |
| BaLi <sub>2</sub> Al <sub>2</sub> Si <sub>2</sub> N <sub>6</sub>               | <i>P4/ncc</i>                       | 4.60 <sup>10</sup><br>(optical band gap) | 3.017 | 0.027 |
| KLaSi(CN <sub>2</sub> ) <sub>4</sub>                                           | <i>P2<sub>1</sub>22<sub>1</sub></i> | unknown                                  | 2.609 | 0.018 |
| RbLaSi(CN <sub>2</sub> ) <sub>4</sub>                                          | <i>I</i>                            | unknown                                  | 2.607 | 0.019 |

<sup>a)</sup> (The optical band gap is multiplied by 67% to convert to an approximate PBE band gap.);

<sup>b)</sup> (The values of  $R_{av}$  and  $D$  are collected from ICSD; For multi-lattice structures, the smallest  $R_{av}$  and corresponding  $D$  values are selected.)

**Table S2.** Selected bond lengths of HP-CaSiN<sub>2</sub>:Ce<sup>3+</sup>.

| Atom           | Distance (Å) | Atom           | Distance (Å) |
|----------------|--------------|----------------|--------------|
| (Ca1/Ce1) – N1 | 2.371(34)    | (Ca2/Ce2) – N1 | 2.546(26)    |
| (Ca1/Ce1) – N2 | 2.497(30)    | (Ca2/Ce2) – N1 | 2.971(28)    |
| (Ca1/Ce1) – N2 | 2.928(29)    | (Ca2/Ce2) – N2 | 2.824(31)    |
| (Ca1/Ce1) – N3 | 2.559(31)    | (Ca2/Ce2) – N3 | 2.507(30)    |
| (Ca1/Ce1) – N3 | 2.068(30)    | (Ca2/Ce2) – N4 | 2.598(29)    |
| (Ca1/Ce1) – N4 | 2.927(27)    | (Ca2/Ce2) – N4 | 2.601(30)    |
|                |              | (Ca2/Ce2) – N4 | 2.965(29)    |

**Table S3.** CIE color coordinates, CRI and CCT of the fabricated white LED.

| Current (mA) | CIE color coordinates | CRI  | CCT (K) |
|--------------|-----------------------|------|---------|
| 100          | (0.4012, 0.3527)      | 89.8 | 3243    |
| 200          | (0.4003, 0.3515)      | 90.1 | 3254    |
| 300          | (0.3993, 0.3504)      | 90.4 | 3268    |
| 400          | (0.3975, 0.3486)      | 90.7 | 3294    |
| 500          | (0.3960, 0.3468)      | 90.9 | 3312    |
| 600          | (0.3952, 0.3459)      | 91.1 | 3322    |
| 700          | (0.3937, 0.3438)      | 91.2 | 3341    |
| 800          | (0.3927, 0.3423)      | 91.4 | 3351    |
| 900          | (0.3919, 0.3413)      | 91.5 | 3360    |
| 1000         | (0.3915, 0.3408)      | 91.5 | 3365    |

### Notes and references

- 1 Y. Zhuo, A. M. Tehrani, A. O. Oliynyk, A. C. Duke and J. Brgoch, *Nat. Commun.*, 2018, **9**, 4377.
- 2 N. L. Adamski, Z. Zhu, D. Wickramaratne and C. G. Van de Walle, *Phys. Rev. B*, 2019, **100**, 155206.
- 3 W. A. Groen, M. J. Kraan and G. Dewith, 1994, **29**, 3161-3166.
- 4 S. Schmiechen, P. Strobel, C. Hecht, T. Reith, M. Siegert, P. J. Schmidt, P. Huppertz, D. Wiechert and W. Schnick, *Chem. Mater.*, 2015, **27**, 1780-1785.
- 5 S. Azam, S. A. Khan and S. Goumri-Said, *Semicond Sci Technol*, 2017, **32**, 055017.
- 6 Q. Wu and J. Zhou, *Dyes Pigment.*, 2019, **161**, 324-330.
- 7 Z. Wang, B. Shen, F. Dong, S. Wang and W.-S. Su, *Phys. Chem. Chem. Phys.*, 2015, **17**, 15065-15070.
- 8 C. Li, H.-W. Zheng, H.-W. Wei, J. Su, F.-H. Liao, Z.-Y. Zhang, L. Xu, Z.-P. Yang, X.-M. Wang and H. Jiao, *Chem. Commun.*, 2018, **54**, 11598-11601.
- 9 X. Yang, Y. Zhang, X. Zhang, J. Chen, H. Huang, D. Wang, X. Chai, G. Xie, M. S. Molokeev, H. Zhang, Y. Liu and B. Lei, *J. Am. Ceram. Soc.*, 2020, **103**, 1773-1781.
- 10 P. Strobel, S. Schmiechen, M. Siegert, A. Tucks, P. J. Schmidt and W. Schnick, *Chem. Mater.*, 2015, **27**, 6109-6115.
